# Supplementary material
Source: ML conference proceedings conference paper supplement (https://openaccess.thecvf.com/content/CVPR2023/html/Kawahara_Teleidoscopic_Imaging_System_CVPR_2023_paper.html)
Supplement: Supplementary file 1 [file Kawahara_Teleidoscopic_Imaging_System_CVPR_2023_supplemental.zip]

Archive with 2 entries (2 files):
- 9127_supp_cr/9127_supp.mp4
- 9127_supp_cr/9127_supp.pdf
